# Supplementary material for: Serum Soluble Toll-Like Receptor 4 is a Predictive Biomarker for Acute Exacerbation and Prognosis of Idiopathic Pulmonary Fibrosis: A Retrospective Study
Source: Springer Nature journal article supplement (doi:10.1007/s00408-025-00800-y), 2025-03-12
Supplement: MOESM1 [file 408_2025_800_MOESM1_ESM.pdf]

## Supplementary Information (SI)

### S1. Serum sTLR4 levels in patients with IPF and healthy participants

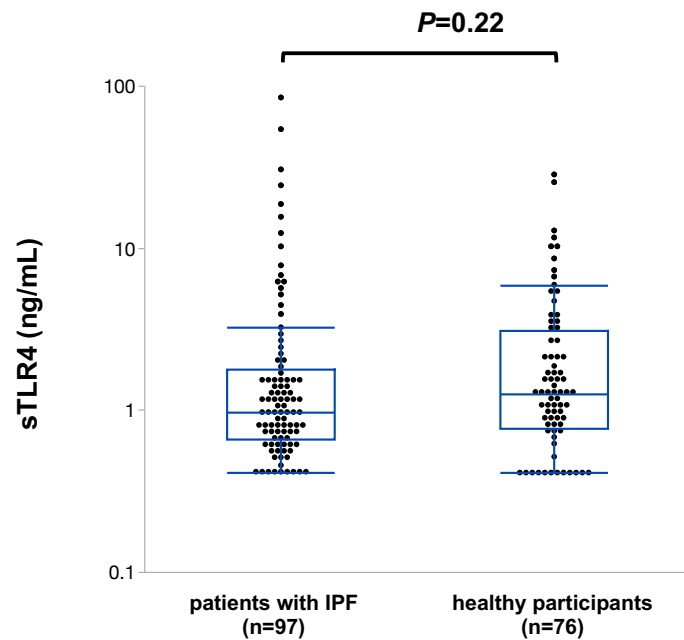

There were no significant differences in serum sTLR4 levels between patients with IPF and healthy participants (1.0 ng/mL [0.7–1.8] and 1.2 ng/mL [0.8–3.1],  $P=0.22$ , respectively). sTLR4, soluble toll-like receptor 4; IPF, idiopathic pulmonary fibrosis

## S2: Clinical characteristics of the study participants

|                             | All participants<br>(n=173) | Patients with IPF<br>(n=97) | Healthy participants<br>(n=76) | <i>P</i> -value* |
|-----------------------------|-----------------------------|-----------------------------|--------------------------------|------------------|
| Age, years                  | 66.0 (59.0–73.0)            | 68.0 (62.0–74.0)            | 61.5 (58.0–72.0)               | 0.024            |
| Sex, male/female            | 149/24                      | 86/11                       | 63/13                          | 0.28             |
| BMI, kg/m <sup>2</sup>      | 23.7 (21.4–25.7)            | 23.7 (21.6–26.2)            | 23.7 (21.2–25.4)               | 0.66             |
| Smoking history, pack years | 31.8 (8.1–50.0)             | 32.8 (15.9–49.5)            | 30.0 (0–57.5)                  | 0.40             |
| FVC, %predicted             | 82.8 (67.4–95.0)            | 74.3 (64.1–88.1)            | 95.0 (86.0–111.3) **           | <.00010          |
| sTLR4, ng/mL                | 1.1 (0.7–2.2)               | 1.0 (0.7–1.8)               | 1.2 (0.8–3.1)                  | 0.22             |

Data are presented as the median (interquartile range)

\* Comparison of patients with IPF and healthy participants

\*\* There were 30 missing data in healthy participants.

BMI, body mass index; FVC, forced vital capacity; IPF, idiopathic pulmonary fibrosis; sTLR4, soluble toll-loke receptor 4

S3: The 5-year survival rate based on acute exacerbation

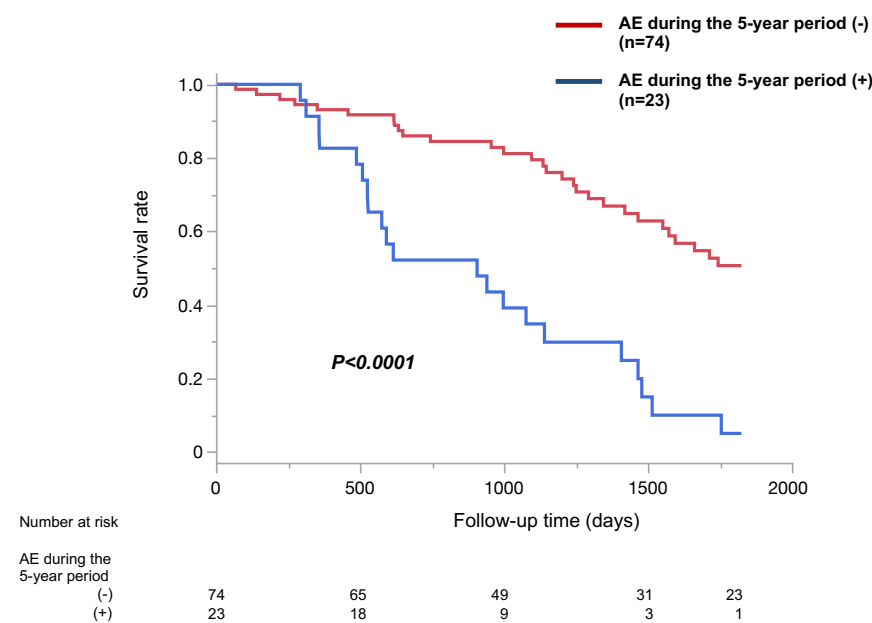

\*  $P<0.05$ , Spearman correlation coefficients

AE, acute exacerbation

**S4: Association between baseline characteristics and serum sTLR4 levels**

|                                   | sTLR4  |            |
|-----------------------------------|--------|------------|
|                                   | $r_s$  | $P$ -value |
| Age, years                        | 0.160  | 0.12       |
| BMI, kg/m <sup>2</sup>            | -0.083 | 0.50       |
| Smoking history, pack years       | 0.072  | 0.49       |
| FVC, %                            | -0.073 | 0.48       |
| WBC, / $\mu$ L                    | 0.130  | 0.21       |
| Neutrophil, / $\mu$ L             | 0.081  | 0.43       |
| Lymphocyte, / $\mu$ L             | 0.058  | 0.58       |
| Monocyte, / $\mu$ L               | 0.23   | 0.020*     |
| Platelet, $\times 10^4$ / $\mu$ L | 0.044  | 0.67       |
| CRP, mg/dL                        | 0.17   | 0.11       |

\*  $P < 0.05$ , Spearman correlation coefficients

BMI, body mass index; CRP, C-reactive protein; FVC, forced vital capacity; sTLR4, soluble toll-like receptor 4; WBC, white blood cells

## S5: Clinical characteristics of the study participants

|                             | All patients with IPF<br>(n=97) | Combination of sTLR4 and monocyte |                     |                     |
|-----------------------------|---------------------------------|-----------------------------------|---------------------|---------------------|
|                             |                                 | Group A (n=17)                    | Group B (n=36)      | Group C (n=44)      |
| Age, years                  | 68.0<br>(62.0–74.0)             | 68.0<br>(61.5–74.5)               | 69.0<br>(62.3–73.8) | 67.0<br>(59.8–74.0) |
| Sex, male/female            | 86/11                           | 17/0                              | 33/3                | 36/8                |
| BMI, kg/m <sup>2</sup>      | 23.7<br>(21.6–26.2)             | 23.7<br>(22.8–25.2)               | 23.8<br>(21.4–25.6) | 23.8<br>(21.5–27.0) |
| Smoking history, pack years | 32.8<br>(15.9–49.5)             | 40.0<br>(22.0–60.0)               | 30.0<br>(18.8–40.0) | 33.3<br>(11.3–49.5) |
| FVC, %predicted             | 74.3<br>(64.1–88.1)             | 76.4<br>(65.6–89.8)               | 74.3<br>(61.8–86.8) | 73.6<br>(63.7–86.7) |

Group A: Patients with soluble toll-like receptor 4 (sTLR4) level higher than 2.2 ng/mL and monocyte level higher than 381.0/μL

Group B: Patients with higher sTLR4 or higher monocyte levels

Group C: Patients with lower sTLR4 and lower monocyte levels

Data are presented as the median (interquartile range).

BMI, body mass index; FVC, forced vital capacity; IPF, idiopathic pulmonary fibrosis; sTLR4, soluble toll-like receptor 4
